# Supplementary material for: Non-patient related SARS-CoV-2 exposure to colleagues and household members impose the highest infection risk for hospital employees with and without patient contact in a German university hospital: follow-up of the prospective Co-HCW Seroprevalence study
Source: bioRxiv or medRxiv preprint supplement (doi:10.1101/2022.10.05.22280728), 2022-10-05
Supplement: Supplementary file [file media-1.pdf]

Table S1. Complete multivariable regression models assessing potential risk factors for any evidence of a SARS-CoV-2 infection (detected by serology and/or PCR) among hospital staff members

| Variable                                                    | adjusted OR (95% CI) | p-value |
|-------------------------------------------------------------|----------------------|---------|
| Age, in years                                               | 1.00 (0.97, 1.03)    | 0.962   |
| Male gender                                                 | 1.18 (0.57, 2.43)    | 0.633   |
| Profession* <sup>1</sup>                                    |                      |         |
| Medical doctor                                              | ref.                 | 0.108   |
| Nurse or care worker                                        | 5.57 (1.24, 25.12)   | 0.025   |
| Reception staff                                             | 3.05 (0.25, 37.65)   | 0.384   |
| Administration staff                                        | 4.92 (1.07, 22.64)   | 0.041   |
| Age, in years                                               | 1.00 (0.96, 1.03)    | 0.835   |
| Male gender                                                 | 1.13 (0.50, 2.54)    | 0.771   |
| COVID-19 risk group according to working place              |                      |         |
| High-risk                                                   | ref.                 | 0.644   |
| Intermediate-risk                                           | 1.15 (0.46, 2.89)    | 0.763   |
| Low-risk                                                    | 1.52 (0.58, 3.98)    | 0.397   |
| Age, in years                                               | 1.00 (0.97, 1.03)    | 0.826   |
| Male gender                                                 | 1.17 (0.56, 2.44)    | 0.676   |
| Reported COVID-19 exposure                                  | 7.19 (2.86, 18.11)   | <0.001  |
| Age, in years                                               | 1.03 (0.99, 1.06)    | 0.122   |
| Male gender                                                 | 1.12 (0.53, 2.36)    | 0.766   |
| Place of reported exposure: family or partner* <sup>3</sup> | 4.46 (2.06, 9.65)    | <0.001  |
| Age, in years                                               | 1.02 (0.99, 1.06)    | 0.212   |
| Male gender                                                 | 1.02 (0.43, 2.39)    | 0.967   |
| Place of reported exposure: friends* <sup>3</sup>           | 0.52 (0.11, 2.35)    | 0.394   |
| Age, in years                                               | 1.02 (0.98, 1.06)    | 0.309   |
| Male gender                                                 | 1.04 (0.45, 2.38)    | 0.925   |
| Place of reported exposure: colleague* <sup>3</sup>         | 2.30 (1.10, 4.79)    | 0.026   |
| Age, in years                                               | 1.02 (0.98, 1.05)    | 0.402   |
| Male gender                                                 | 1.07 (0.47, 2.48)    | 0.867   |
| Place of reported exposure: patient* <sup>3</sup>           | 0.36 (0.18, 0.75)    | 0.007   |
| Age, in years                                               | 1.01 (0.98, 1.05)    | 0.528   |
| Male gender                                                 | 1.15 (0.50, 2.68)    | 0.742   |
| Place of reported exposure: other* <sup>3</sup>             | 2.60 (0.22, 30.41)   | 0.446   |
| Age, in years                                               | 1.02 (0.98, 1.06)    | 0.304   |
| Male gender                                                 | 0.95 (0.41, 2.20)    | 0.913   |
| Accident with biological material                           | 2.77 (0.54, 14.23)   | 0.222   |
| Age, in years                                               | 1.00 (0.97, 1.03)    | 0.945   |
| Male gender                                                 | 1.15 (0.55, 2.38)    | 0.711   |
| Compliance to wear PPE* <sup>2</sup>                        | 0.58 (0.11, 2.94)    | 0.507   |
| Age, in years                                               | 0.99 (0.94, 1.05)    | 0.855   |
| Male gender                                                 | 0.96 (0.31, 2.94)    | 0.945   |
| Use of public transport                                     | 1.77 (0.64, 4.54)    | 0.235   |
| Age, in years                                               | 1.00 (0.97, 1.03)    | 0.987   |
| Male gender                                                 | 1.20 (0.58, 2.48)    | 0.625   |
| Number of household members                                 | 0.99 (0.77, 1.27)    | 0.918   |
| Age, in years                                               | 1.00 (0.97, 1.03)    | 0.965   |
| Male gender                                                 | 1.18 (0.57, 2.43)    | 0.661   |
| More than 1 household member                                | 0.92 (0.44, 1.95)    | 0.835   |
| Age, in years                                               | 1.00 (0.97, 1.03)    | 0.956   |
| Male gender                                                 | 1.17 (0.57, 2.42)    | 0.668   |
| Returning from risk area                                    | 1.25 (0.59, 2.65)    | 0.562   |
| Age, in years                                               | 1.00 (0.97, 1.03)    | 0.942   |

|                                               |                   |       |
|-----------------------------------------------|-------------------|-------|
| Male gender                                   | 1.17 (0.57, 2.43) | 0.664 |
| Travel to abroad                              | 1.20 (0.59, 2.44) | 0.614 |
| Age, in years                                 | 1.00 (0.97, 1.03) | 0.930 |
| Male gender                                   | 1.19 (0.57, 2.46) | 0.641 |
| Participation at events with $\geq 5$ persons | 1.32 (0.70, 2.51) | 0.389 |
| Age, in years                                 | 1.00 (0.97, 1.03) | 0.832 |
| Male gender                                   | 1.17 (0.56, 2.42) | 0.675 |

\*<sup>1</sup> 71 persons with “other profession” were excluded from analysis

\*<sup>2</sup> Information is missing for 262 participants

\*<sup>3</sup> Among participants with reported place of exposure

Abbreviations: CI, confidence interval; OR, odds ratio; PCR, polymerase chain reaction; PPE, personal protective equipment; ref., reference.
